# Supplementary material for: A luminescent Tb3+ cholate hydrogel-based multi-functionalized platform for Hg2+ and NO2 detection
Source: Royal Society of Chemistry journal article supplement (doi:10.1039/d2nj00344a), 2022-01-01
Supplement: d2nj00344a1.pdf [file d2nj00344a1.pdf]

## Support information

### **Tb<sup>3+</sup> luminescence cholate hydrogel-based multi-functionalized platform for Hg<sup>2+</sup> and NO<sub>2</sub> detection**

Jiaxin Yuan<sup>a,b</sup>; Ao Shen<sup>a</sup>; Xiaohui Hao<sup>a</sup>; Man Du<sup>c\*</sup>; Xiaoyu Du<sup>a</sup>; Shufeng Ma<sup>a</sup>; Mengwen Li<sup>a</sup>;

Lifeng Zhang<sup>b\*</sup>; Yunxu Yang<sup>a,b\*</sup>

*<sup>a</sup> Department of Chemistry and Chemical Engineering, School of Chemistry and Biological Engineering, University of Science and Technology Beijing, Beijing 100083, China.*

*<sup>b</sup> State Key Laboratory of Baiyunobo Rare Earth Resource Researches and Comprehensive Utilization, Baotou Research Institute of Rare Earths, Baotou 014030, P. R. China.*

*<sup>c</sup> School of Chemical and Pharmaceutical Engineering, Hebei University of Science and Technology, Shijiazhuang, 050018, China.*

**Corresponding Author:** Yunxu Yang<sup>a,b</sup>; Lifeng Zhang<sup>b</sup>; Man Du<sup>b</sup>.

E-mail addresses:

yxyang@ustb.edu.cn (Yunxu Yang);

[131310212@163.com](mailto:131310212@163.com) (Lifeng Zhang)

mandu@hebust.edu.cn (Man Du).

## Contents:

|           |                                                                                                    |    |
|-----------|----------------------------------------------------------------------------------------------------|----|
| Fig. S1   | Time-delayed emission spectrum with gradual addition of $\text{Hg}^{2+}$ (0-21 $\mu\text{M}$ ).    | 4  |
| Fig. S2   | Time-delayed emission spectrum in $\text{NO}_2$ (0-5 ppm) environment.                             | 5  |
| Table S1  | Compares with some documents that detect for $\text{Hg}^{2+}$ .                                    | 5  |
| Table S2. | Compares with some documents that detect for $\text{NO}_2$ .                                       | 6  |
| Fig. S3   | The mass spectrum of PS-BD.                                                                        | 7  |
| Fig. S4   | The $^1\text{H}$ NMR spectrum of PS-BD.                                                            | 7  |
| Fig. S5   | The $^{13}\text{C}$ NMR spectrum of PS-BD.                                                         | 8  |
| Fig. S6   | The mass spectrum of the reaction of PS-BD with $\text{Hg}^{2+}$ to form compounds.                | 8  |
| Fig. S7   | The $^1\text{H}$ NMR spectrum of the reaction of PS-BD with $\text{Hg}^{2+}$ to form compounds.    | 9  |
| Fig. S8   | The $^{13}\text{C}$ NMR spectrum of the reaction of PS-BD with $\text{Hg}^{2+}$ to form compounds. | 9  |
| Fig. S9   | The mass spectrum of PS-BS.                                                                        | 10 |
| Fig. S10  | The $^1\text{H}$ NMR spectrum of PS-BS.                                                            | 10 |
| Fig. S11  | The $^{13}\text{C}$ NMR spectrum of PS-BS.                                                         | 11 |
| Fig. S12  | The mass spectrum of the reaction of PS-BS with $\text{NO}_2$ to form compounds.                   | 11 |
| Fig. S13  | The $^1\text{H}$ NMR spectrum of the reaction of PS-BS with $\text{NO}_2$ to form compounds.       | 12 |

|                                                                                                                        |           |
|------------------------------------------------------------------------------------------------------------------------|-----------|
| <b>Fig. S14</b> The $^{13}\text{C}$ NMR spectrum of the reaction of PS-BS with $\text{NO}_2$ to form<br>compounds..... | <b>12</b> |
| <b>References</b> .....                                                                                                | <b>13</b> |

## Materials and instrumentation

Ethylene dithiol, 4-biphenylmethanol and 4-phenylbenzaldehyde were purchased from Tianjin Siensi Opto Technology Co., Ltd. (Tianjin, China); Tert-butyldimethylchlorosilane, DMAP (4-dimethylaminopyridine) were purchased from Beijing Coupling Technology Co., Ltd.; Sodium cholate, Tetrachloride hexahydrate was purchased from Beijing Yinuokai Technology Co., Ltd. (Beijing, China); Solvents and other chemical reagents were purchased from Beijing Lanyi Chemical Products Co., Ltd. (Beijing, China), all of which were analytically pure and could be used without further purification. The water used in the experiment was all ultrapure water. Chitosan non-woven fabric was purchased from Tianjing Youtai nonwoven fabric Co. Ltd.

Ultraviolet visible (UV) absorption spectra were obtained by a UV-2600 spectrometer (Techcomp, China), Fluorescence emission studies were carried out with a Hitachi F-4500 Fluorescence Spectrophotometer.  $^1\text{H}$  NMR and  $^{13}\text{C}$  NMR spectra were measured on a Varian Gemin-400 MHz spectrometer with chemical shifts reported in ppm (TMS as internal standard). ESI-HRMS spectra were recorded with Bruker spectrometers. Spectrophotometer CS-520 and iPhone 12 promax were used to construct the smart sensing platform. Scanning Electron Microscope (SEM) images were recorded using Zeiss G300 instrument. Inductively Coupled Plasma-Mass spectrometry (ICP-MS) was recorded in Skyray instrument with ICP20607.

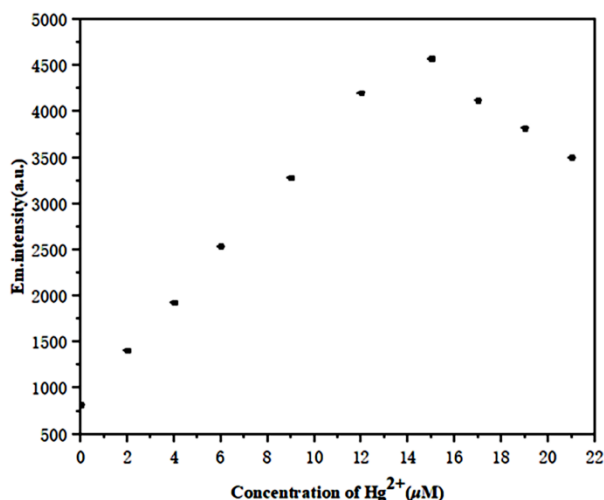

**Fig. S1** Time-delayed emission spectrum of PS-BD@ Tb<sup>3+</sup>/hydrogel (20 μM) excited at 300 nm when Hg<sup>2+</sup> (0-21 μM) is gradually added.

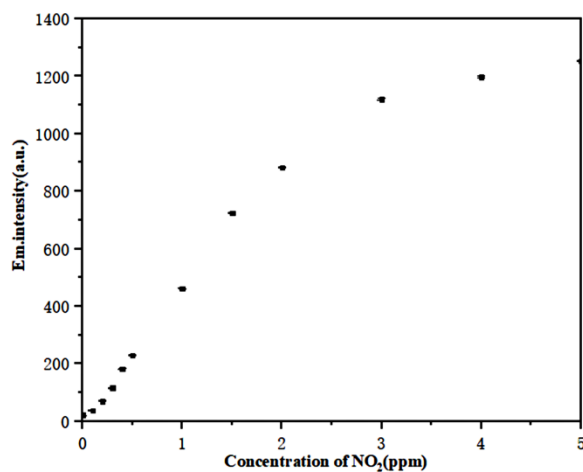

**Fig. S2** Time-delayed emission spectrum of PS-BS@Tb<sup>3+</sup>/hydrogel (20 μM) excited at 300 nm after 10 min in NO<sub>2</sub> (0-5 ppm) environment.

**Table S1** Compares with some documents that detect for Hg<sup>2+</sup>.

| Probe | Sensor Materials                                                                                                            | Detection                | Sensing | Ref. |
|-------|-----------------------------------------------------------------------------------------------------------------------------|--------------------------|---------|------|
|       |                                                                                                                             | Limit                    | Mode    |      |
| 1     | CN-vinyl                                                                                                                    | 3.7×10 <sup>-8</sup> M   | turn-on | [1]  |
| 2     | AADT                                                                                                                        | 2.34×10 <sup>-8</sup> M  | both    | [2]  |
| 3     | 2,2'-(2,2-di(thiophen-2-yl)eth-ene-1,1-diyl)dipyridine and<br>2,2'-2,2-di([2,2'-bithiophen]-5-yl)ethene-1,1-diyl)dipyridine | 4.8 × 10 <sup>-8</sup> M | turn-on | [3]  |
| 4     | naphthalene-based chemodosimeter 1                                                                                          | 5.0×10 <sup>-6</sup> M   | turn-on | [4]  |
| 5     | 1-(2-phenyl-2H-[1,2,3]<br>triazole-4-carbonyl)thiosemicarbazide                                                             | 3.70×10 <sup>-8</sup> M  | turn-on | [5]  |

|    |                                        |                         |              |           |
|----|----------------------------------------|-------------------------|--------------|-----------|
| 6  | Schiff base                            | $2.64 \times 10^{-8}$ M | off-on-off   | [6]       |
| 7  | pyren-1-ylmethylene-thiazol-2-yl-amine | $2.7 \times 10^{-7}$ M  | colorimetric | [7]       |
| 8  | D1                                     | $6.62 \times 10^{-7}$ M | turn-off     | [8]       |
| 9  | TbTATAB                                | $4.4 \times 10^{-9}$ M  | turn-off     | [9]       |
| 10 | CA-S(tandain)                          | $1.26 \times 10^{-7}$ M | colorimetric | [10]      |
| 11 | CDs-AgNPs                              | $3.6 \times 10^{-12}$ M | both         | [11]      |
| 12 | PS-BD@Tb <sup>3+</sup> /hydrogel       | $2.4 \times 10^{-7}$ M  | turn-on      | This work |

**Table S2** Compares with some documents that detect for NO<sub>2</sub>.

| Number | Sensor Materials                             | Detection Limit | Sensing Mode | Ref.      |
|--------|----------------------------------------------|-----------------|--------------|-----------|
| 1      | Ni(II) complexes- sulforhodamine B           | -               | turn-on      | [12]      |
| 2      | Cu(II) complexes–DDMEP/DMABP                 | -               | turn-on      | [13]      |
| 3      | BODIPY                                       | 0.46 ppm        | colorimetric | [14]      |
| 4      | Trimethylsilyl benzyl ether or oxime groups  | 0.02 ppm(Ab)    | colorimetric | [15]      |
| 5      | TICT                                         | 0.09 ppm        | turn-off     | [16]      |
| 6      | CDs-QDs                                      | 19 nM           | colorimetric | [17]      |
| 7      | MFM-520                                      | -               | adsorption   | [18]      |
| 8      | Tb(BTC) (BTC = benzene-1,3,5-tricarboxylate) | 4.0 ppm         | turn-off     | [19]      |
| 9      | PS-BD@Tb <sup>3+</sup> /hydrogel             | 0.075 ppm       | turn-on      | This work |

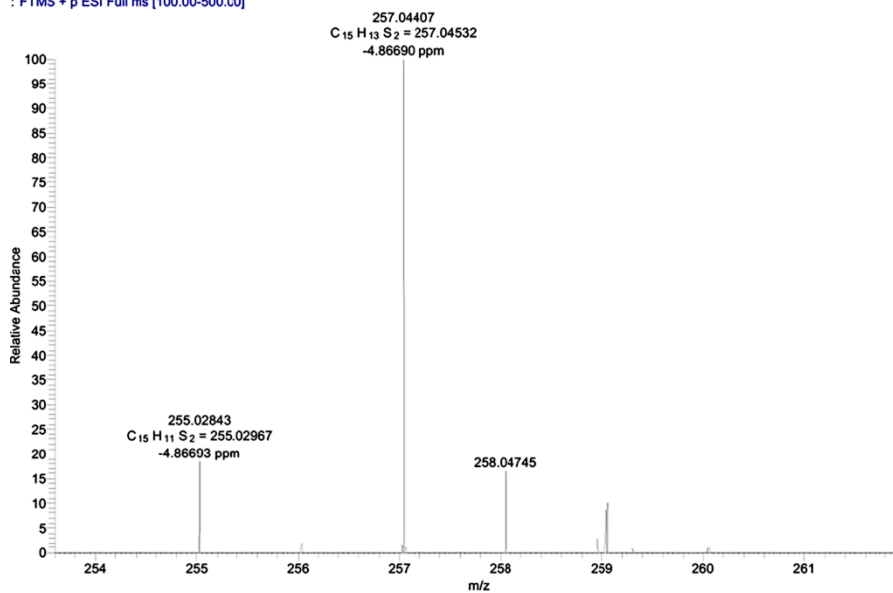

Fig. S3 The mass spectrum of PS-BD.

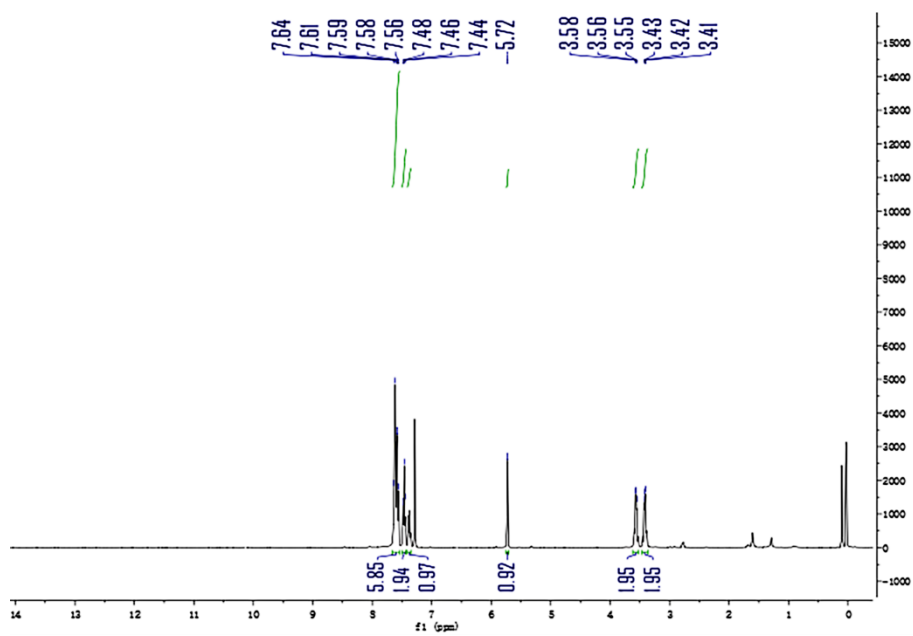

Fig. S4 The <sup>1</sup>H NMR spectrum of PS-BD.

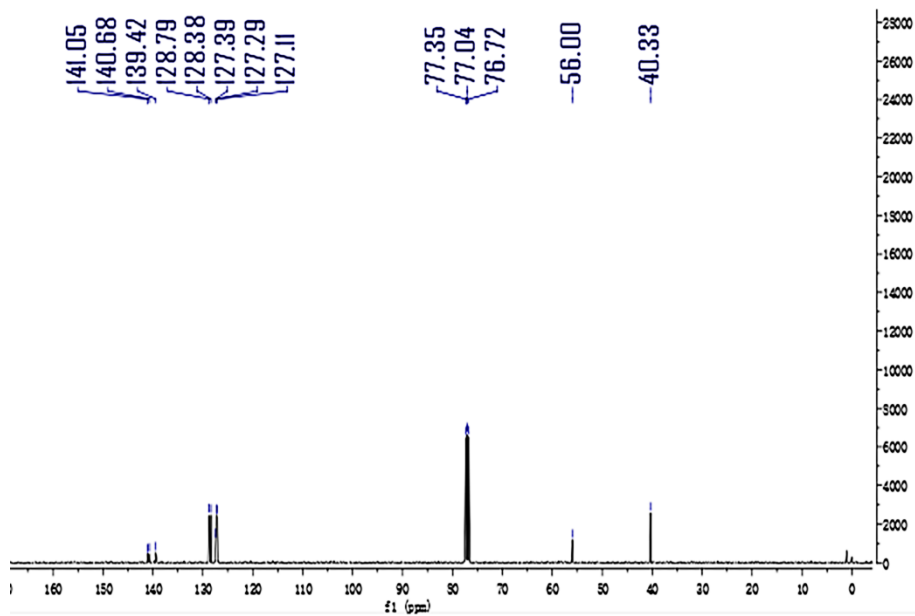

Fig. S5 The  $^{13}\text{C}$  NMR spectrum of PS-BD.

F: FTMS + c ESI Full ms [50.00-300.00]

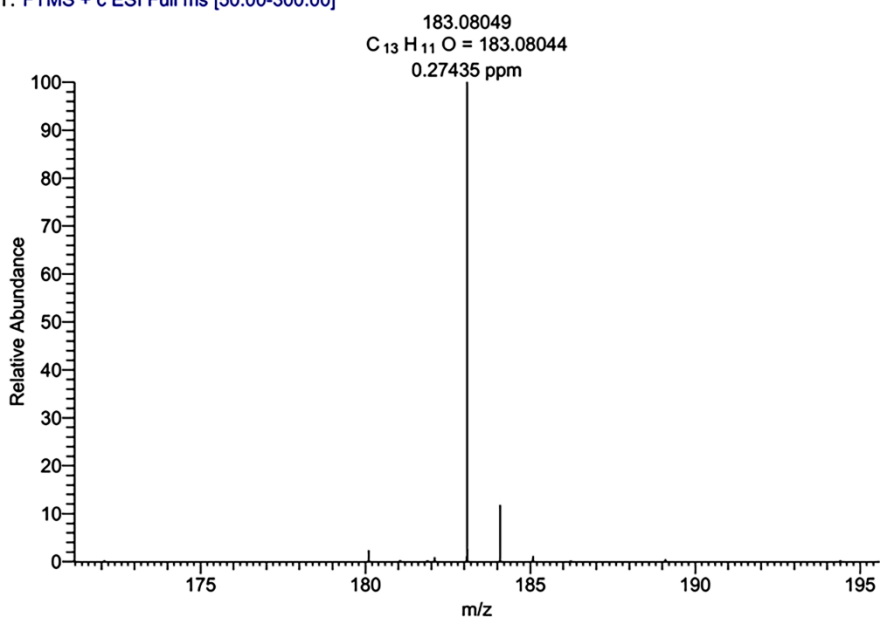

Fig. S6 The mass spectrum of the reaction of PS-BD with  $\text{Hg}^{2+}$  to form compounds.



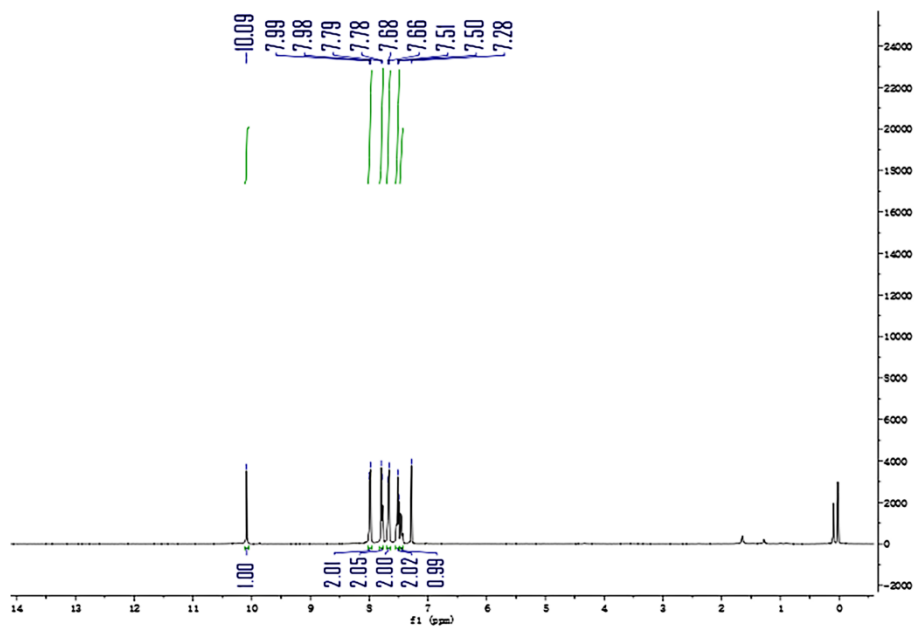

Fig. S7 The  $^1\text{H}$  NMR spectrum of the reaction of PS-BD with  $\text{Hg}^{2+}$  to form compounds.

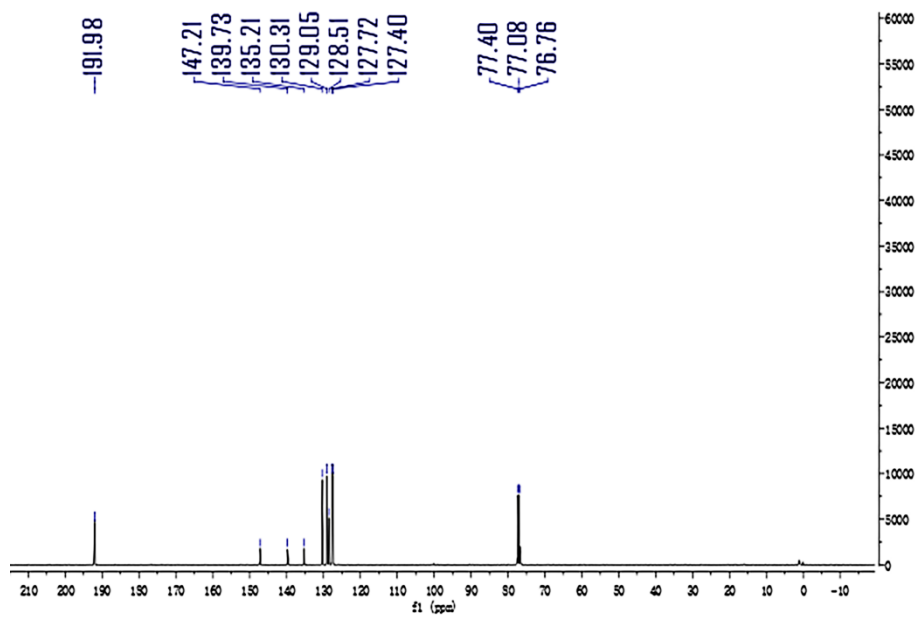

Fig. S8 The  $^{13}\text{C}$  NMR spectrum of the reaction of PS-BD with  $\text{Hg}^{2+}$  to form compounds.

20210924\_002 #106 RT: 0.24 AV: 1 SB: 2 1.00 , 1.00 NL: 1.07E8  
F: FTMS + p EI Full ms [100.0000-1500.0000]

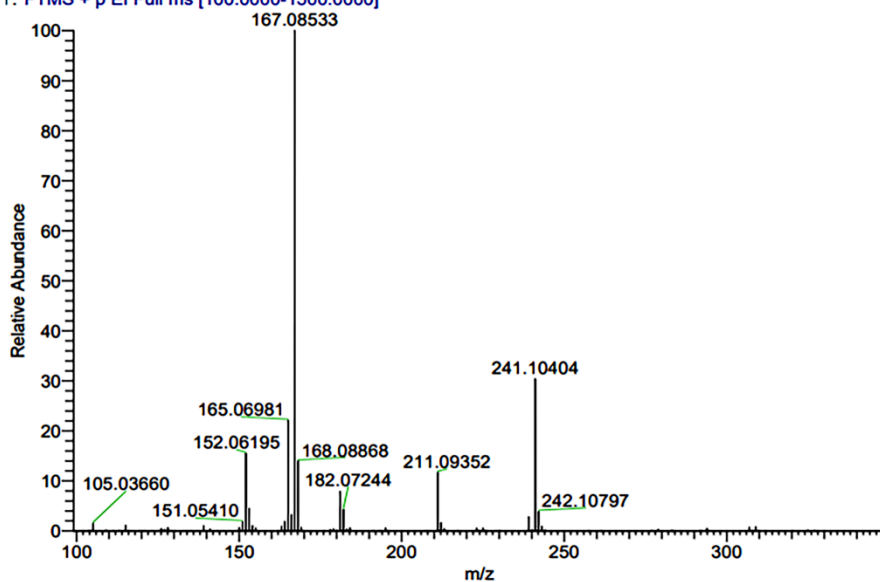

Fig. S9 The mass spectrum of PS-BS.

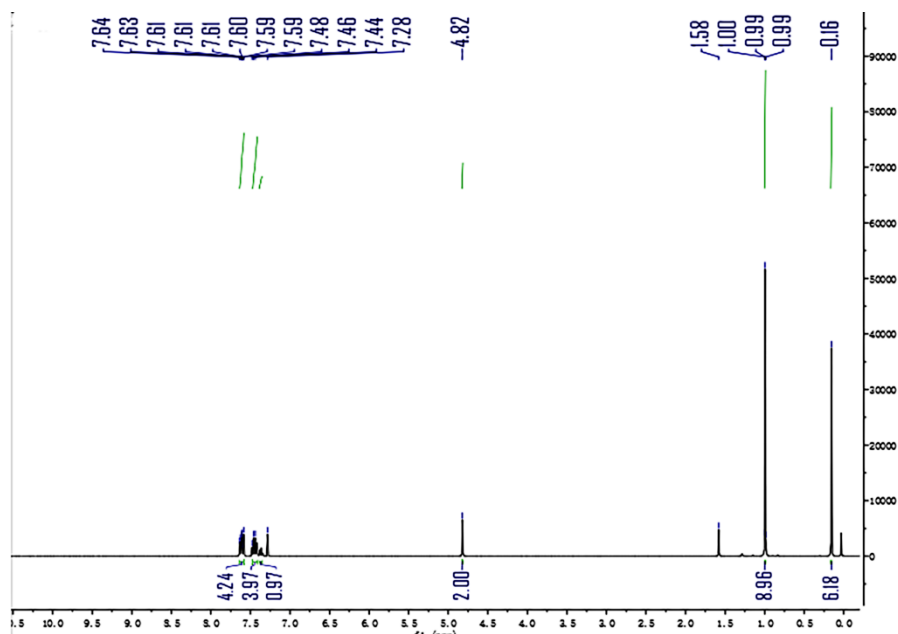

Fig. S10 The  $^1\text{H}$  NMR spectrum of PS-BS.

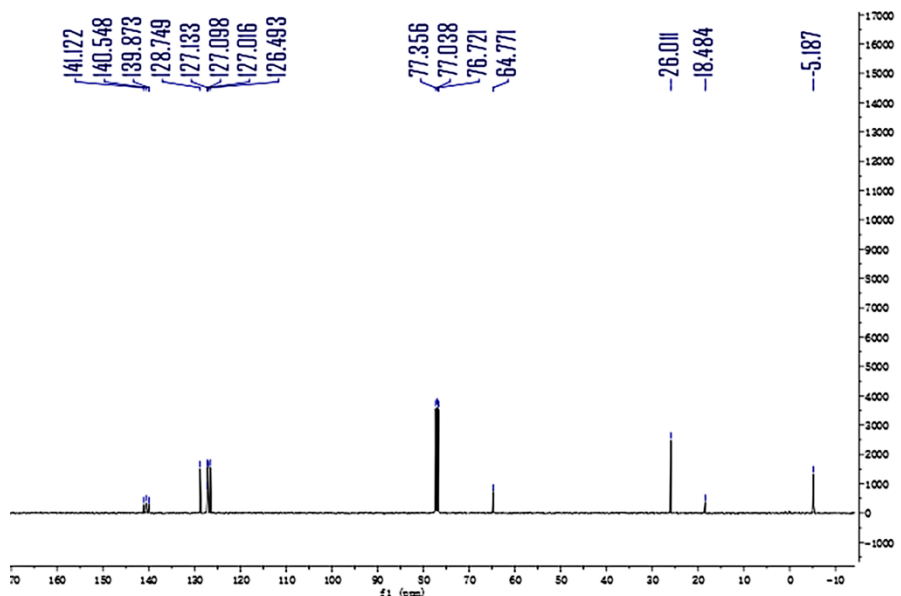

Fig. S11 The  $^{13}\text{C}$  NMR spectrum of PS-BS.

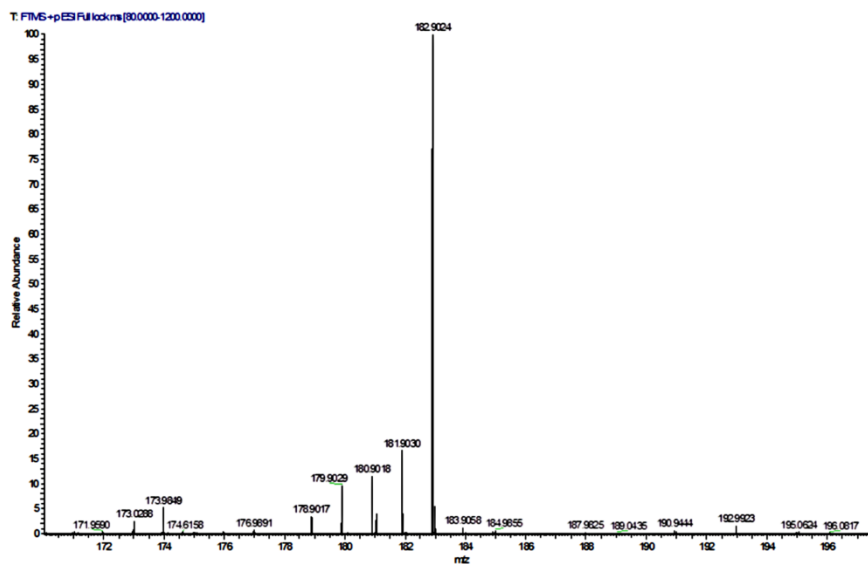

Fig. S12 The mass spectrum of the reaction of PS-BS with  $\text{NO}_2$  to form compounds.

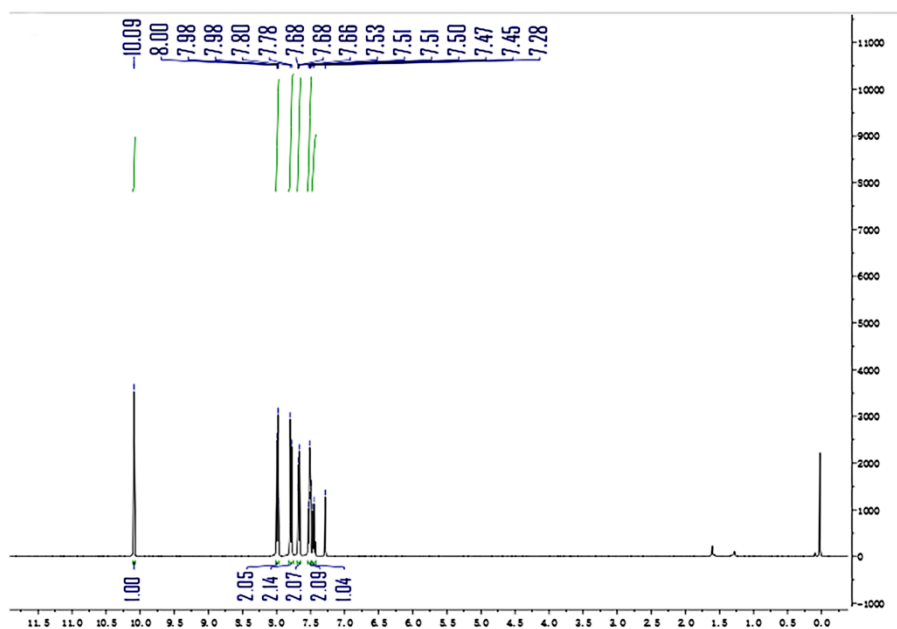

Fig. S13 The  $^1\text{H}$  NMR spectrum of the reaction of PS-BS with  $\text{NO}_2$  to form compounds.

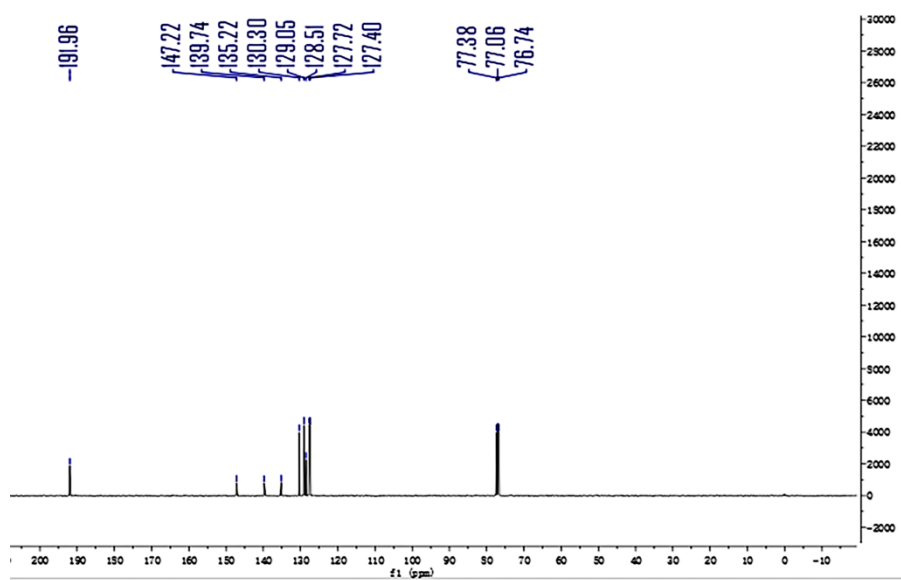

Fig. S14 The  $^{13}\text{C}$  NMR spectrum of the reaction of PS-BS with  $\text{NO}_2$  to form compounds.

## References

- [1] A.Z. Wang, Y.X. Yang, F.F. Yu, L.W. Xue, B.W. Hu, W.P. Fan, Y.J. Dong, *Talanta*, 2015, **132**, 864-870.
- [2] J. Ma, C. Zhang, Y. Xiao, M. Zhang, Q. Wang, W. Zheng, S. Zhang, *J. Photochem. Photobiol. A*, 2019, **378**, 142-146.
- [3] M.T. Gabr, F.C. Pigge, *Mater. Chem., 2017, Front. 1*, 1654-1661.
- [4] V.R. Nandhakumar, *J. Lumin.*, 2014, **145**, 733-736.
- [5] H. Lin, W. Shi, Y. Tian, F.D. Ma, L.X. Xu, J.C. Ma, Y.H.Hui, Z.F. Xie, *J. Lumin.*, 2015, **157**, 280-284.
- [6] G.V. Kumar, M.P. Kesavan, A. Tamilselvi, G. Rajagopal, J. D. Raja, K. Sakthipandi, J. Rajesh, G. Sivaraman, *Sens. Actuators B Chem.*, 2018, **73**, 305-315.
- [7] V. Tekuri, S.K. Sahoo, D. R. Trivedi, *Spectrochim. Acta A Mol. Biomol. Spectrosc.*, 2019, **218**, 19-26.
- [8] Z.E. Chen, H. Zhang, Z. Iqbal, *Spectrochim. Acta A Mol. Biomol. Spectrosc.*, 2019, **215**, 34-40.
- [9] T.F. Xia, T. Song, G.G. Zhang, Y.J. Cui, Y. Yang, Z.Y. Wang, G.D. Qian, *Chem. Eur. J.*, 2016, **22**, 18429-18434.
- [10] X. Chen, J. Fang, S.J. Liao, R. Mia, W.J. Li, C. Gao, D. Tian, W. Li, *Sens. Actuators B Chem.*, 2021, **342**, 0925-4005.
- [11] Q.X. Zhou, Y.L. Liu, Y.L. Wu, Z. Li, Y.H. Li, M.H. Liu, T.X. Qu, C.M. Chen, *Chemosphere*, 2021, **274**, 129959.
- [12] Y. Yan, K. Saaranan, H. Yu, S. Ramishett, L.W. Deng, S.H. Wang, L. Huang, D.J. Huang, *J. Am. Chem. Soc.*, 2013, **135**, 5312-5315.

- [13] Biplab Mondal and Vikash Kumar, *RSC Adv.*, 2014, **4**, 61944.
- [14] L.A. Juárez, A.M. Costero, M. Parra, S. Gil, F. Sancenón and R. Martínez-Máñez, *Chem. Commun.*, 2015, **51**, 1725-1727.
- [15] A.M. Costero, L.A. Juárez, M. Parra, S. Gil, J. Ródenas, R. Martinez-Manez, F. Sancenón, *RSC Adv.*, 2016, **6**, 43719–43723.
- [16] J.B. Chen, B. Li, Y. Xiong, J. Sun, *Sens. Actuators B Chem.*, 2018, **255**, 275–282.
- [17] Y.H. Yan, J. Sun, K. Zhang, H.J. Zhu, H. Yu, M.T. Sun, D.J. Huang, S.H. Wang, *Anal. Chem.*, 2015, **87**, 2087–2093.
- [18] J.N. Li, X. Han, X.R. Zhang, A.M. Sheveleva, Y.Q. Cheng, F. Tuna, E.J.L. McInnes, L.J.M. McPherson, S.J. Teat, L.L. Daemen, A.J. Ramirez-Cuesta, M. Schröder, S.H. Yang, *Nat. Chem.*, 2019, **11**, 1085–1090.
- [19] F.G. Moscoso, J. Almeida, A. Sousaraei, T. Lopes-Costa, A.M.G. Silva, J. Cabanillas-Gonzalez, L. Cunha-Silva, J. M. Pedrosa, *Mol. Syst. Des. Eng.*, 2020, **5**, 1048-1056.
